# Supplementary material for: The Effect of Periprocedural Clinical Factors Related to the Course of STEMI in Men and Women Based on the National Registry of Invasive Cardiology Procedures (ORPKI) between 2014 and 2019
Source: MDPI journal article supplement (doi:10.3390/jcm10235716), 2021-12-06
Supplement: s1 [file s1]

**Table S1.** All significant factors affecting periprocedural mortality among men.

| Variable                                            | Odds ratio | 95% CI        | <i>p</i> |
|-----------------------------------------------------|------------|---------------|----------|
| Age >65                                             | 1.57       | 1.32–1.87     | <0.001   |
| Diabetes                                            | 1.47       | 1.19–1.81     | <0.001   |
| Previous stroke                                     | 1.38       | 0.97–1.97     | 0.074    |
| Previous MI                                         | 1.22       | 0.98–1.51     | 0.074    |
| Smoking status                                      | 0.97       | 0.79–1.19     | 0.787    |
| Psoriasis                                           | 2.43       | 1.09–5.40     | 0.029    |
| Hypertension                                        | 0.74       | 0.62–0.89     | <0.001   |
| Kidney disease                                      | 1.29       | 0.91–1.81     | 0.148    |
| Time from pain to first contact                     | 1.16       | 1.00–1.34     | 0.049    |
| OHCA                                                | 3.18       | 2.60–3.89     | <0.001   |
| STEMI P2Y12                                         | 0.59       | 0.49–0.71     | <0.001   |
| GPI IIb IIIa during angiogram                       | 1.26       | 1.03–1.52     | 0.022    |
| Vascular access                                     | 2.92       | 2.44–3.49     | <0.001   |
| GPI IIb IIIa during PCI                             | 1.41       | 1.04–1.92     | 0.027    |
| TIMI after PCI                                      | 0.28       | 0.25–0.30     | <0.001   |
| Total amount of contrast used during procedure (ml) | 0.999      | 0.996–0.999   | <0.001   |
| Total radiation dose during procedure (mGy)         | 1.0001     | 1.0000–1.0002 | 0.03     |
| LMCA                                                | 8.29       | 6.57–10.48    | <0.001   |
| LAD                                                 | 2.18       | 1.84–2.58     | <0.001   |
| LIMA RIMA                                           | 3.08       | 0.62–15.36    | 0.171    |
| Bifurcation                                         | 0.77       | 0.56–1.07     | 0.123    |
| DES                                                 | 1.05       | 0.82–1.33     | 0.713    |
| BVS                                                 | 1.74       | 0.42–7.24     | 0.449    |
| BMS                                                 | 2.13       | 1.55–2.93     | <0.001   |
| Cardiac arrest during angiogram                     | 18.72      | 14.07–24.91   | <0.001   |
| No reflow during PCI                                | 1.33       | 0.95–1.86     | 0.1      |

BMS, bare metal stent; BVS, bioresorbable vascular scaffold; DES, drug eluting stent; MI, myocardial infarction; GPI IIb/IIIa, IIb/IIIa glycoprotein inhibitor; LAD, critical stenosis of left anterior descending; LIMA/RIMA, critical stenosis of left internal mammary artery/ right internal mammary artery; LMCA, critical stenosis of left main coronary artery; OHCA, out of hospital cardiac arrest; PCI, percutaneous coronary intervention; TIMI, thrombolysis in myocardial infarction.

**Table S2.** All significant factors affecting periprocedural mortality among women.

| Variable      | Odds ratio | 95% CI     | <i>p</i> value |
|---------------|------------|------------|----------------|
| Age >65 years | 1.43       | 1.13–1.80  | 0.003          |
| Diabetes      | 1.43       | 1.17–1.76  | 0.001          |
| Previous MI   | 1.32       | 1.03–1.68  | 0.026          |
| Smoking       | 0.67       | 0.49–0.91  | 0.011          |
| Hypertension  | 0.69       | 0.58–0.845 | <0.001         |

|                                 |       |            |        |
|---------------------------------|-------|------------|--------|
| Kidney disease                  | 1.39  | 1.03–1.89  | 0.032  |
| Time from pain to first contact | 1.19  | 1.03–1.38  | 0.02   |
| OHCA                            | 3.60  | 2.86–4.54  | <0.001 |
| P2Y12                           | 0.55  | 0.45–0.67  | <0.001 |
| Femoral access                  | 2.76  | 2.28–3.35  | <0.001 |
| TIMI after PCI                  | 0.31  | 0.28–0.34  | <0.001 |
| LMCA                            | 4.48  | 3.24–6.19  | <0.001 |
| LAD                             | 1.88  | 1.57–2.26  | <0.001 |
| Bifurcation                     | 0.73  | 0.49–1.09  | 0.122  |
| DES                             | 0.70  | 0.50–0.98  | 0.036  |
| BVS                             | 0.92  | 0.12–7.19  | 0.936  |
| BMS                             | 1.66  | 1.14–2.42  | 0.008  |
| Number of implanted stents      | 1.33  | 1.10–1.60  | 0.003  |
| Cardiac arrest during angiogram | 12.42 | 9.11–16.92 | <0.001 |
| No reflow                       | 0.95  | 0.66–1.35  | 0.762  |
| Coronary artery perforation     | 1.97  | 0.90–4.32  | 0.092  |

BMS, bare metal stent; BVS, bioresorbable vascular scaffold; DES, drug eluting stent; MI, myocardial infarction; LAD, critical stenosis of left anterior descending; LMCA, critical stenosis of left main coronary artery; OHCA, out of hospital cardiac arrest; PCI, percutaneous coronary intervention; TIMI, thrombolysis in myocardial infarction.

**Table S3.** Factors related to clinical characteristics and prehospital management.

| Variable                                                 | Total<br><i>n</i> =1465 | Women<br><i>n</i> =663 (45,3) | Men<br><i>n</i> =802 (54,7) | <i>p</i> value |
|----------------------------------------------------------|-------------------------|-------------------------------|-----------------------------|----------------|
| Clinical factors                                         |                         |                               |                             |                |
| Age, median (Q1–Q3)                                      | 73 (64–82)              | 79 (68–85)                    | 68 (61–78)                  | <0.0001        |
| Age (>65 years)                                          | 1012 (69,1)             | 537 (81,0)                    | 475 (59,2)                  | <0.0001        |
| Diabetes ( <i>n</i> , %)                                 | 418 (28,5)              | 228 (34,4)                    | 190 (23,7)                  | <0.0001        |
| Previous stroke ( <i>n</i> , %)                          | 105 (7,2)               | 51 (7,7)                      | 54 (6,7)                    | 0.4788         |
| Previous MI ( <i>n</i> , %)                              | 300 (20,5)              | 124 (18,7)                    | 176 (21,9)                  | 0.1260         |
| Previous PCI ( <i>n</i> , %)                             | 206 (14,1)              | 78 (11,8)                     | 128 (16,0)                  | 0.0215         |
| Previous CABG ( <i>n</i> , %)                            | 33 (2,3)                | 11 (1,7)                      | 22 (2,7)                    | 0.1641         |
| Smoking ( <i>n</i> , %)                                  | 246 (16,8)              | 61 (9,2)                      | 185 (23,1)                  | <0.0001        |
| Psoriasis ( <i>n</i> , %)                                | 14 (1,0)                | 4 (0,6)                       | 10 (1,2)                    | 0.2077         |
| Hypertension ( <i>n</i> , %)                             | 777 (53,0)              | 377 (56,9)                    | 400 (49,9)                  | 0.0077         |
| Kidney disease ( <i>n</i> , %)                           | 132 (9,0)               | 73 (11,0)                     | 59 (7,4)                    | 0.0151         |
| COPD ( <i>n</i> , %)                                     | 38 (2,6)                | 14 (2,1)                      | 24 (3,0)                    | 0.2912         |
| Prehospital management                                   |                         |                               |                             |                |
| Time from pain to first contact ( <i>n</i> , %)          |                         |                               |                             |                |
| <12 hours                                                | 1116 (76,2)             | 488 (73,6)                    | 628 (78,3)                  | 0.1059         |
| 12–48 hours                                              | 245 (16,7)              | 124 (18,7)                    | 121 (15,1)                  |                |
| ≥ 48 hours                                               | 104 (7,1)               | 51 (7,7)                      | 53 (6,6)                    |                |
| Time from pain to inflation or angiogram ( <i>n</i> , %) |                         |                               |                             |                |
| <12 hours                                                | 1387 (94,7)             | 623 (94,0)                    | 764 (95,3)                  | 0.4563         |
| 12–48 hours                                              | 55 (3,8)                | 27 (4,1)                      | 28 (3,5)                    |                |
| ≥ 48 hours                                               | 23 (1,6)                | 13 (2,0)                      | 10 (1,2)                    |                |

|                                                                   |             |            |            |        |
|-------------------------------------------------------------------|-------------|------------|------------|--------|
| Time from first contact to inflation or angiogram ( <i>n</i> , %) | 1222 (83,4) | 541 (81,6) | 681 (84,9) | 0.1794 |
| <12 hours                                                         | 170 (11,6)  | 88 (13,3)  | 82 (10,2)  |        |
| 12–48 hours                                                       | 73 (5,0)    | 34 (5,1)   | 39 (4,9)   |        |
| ≥ 48 hours                                                        |             |            |            |        |
| Direct transfer to cath lab ( <i>n</i> , %)                       | 437 (29,8)  | 201 (30,3) | 236 (29,4) | 0,7109 |
| OHCA ( <i>n</i> , %) STEMI                                        | 434 (29,6)  | 169 (25,5) | 265 (33,0) | 0.0016 |

CABG, coronary aortic bypass grafting; COPD, chronic obstructive pulmonary disease; MI, myocardial infarction; OHCA, out of hospital cardiac arrest; PCI, percutaneous coronary intervention.

**Table S4.** Pharmacological and periprocedural factors.

| Variable                                      | Total<br><i>n</i> =1465 | Women<br><i>n</i> =663 (45,3) | Men<br><i>n</i> =802 (54,7) | <i>p</i> value |
|-----------------------------------------------|-------------------------|-------------------------------|-----------------------------|----------------|
| Pharmacological factors                       |                         |                               |                             |                |
| ASA ( <i>n</i> , %)                           | 383 (26,1)              | 195 (29,4)                    | 188 (23,4)                  | 0.0097         |
| UFH ( <i>n</i> , %)                           | 1149 (78,4)             | 531 (80,1)                    | 618 (77,1)                  | 0.1602         |
| LMWH ( <i>n</i> , %)                          | -                       | -                             | -                           | -              |
| P2Y12 ( <i>n</i> , %)                         | 961 (65,6)              | 439 (66,2)                    | 522 (65,1)                  | 0.6514         |
| Thrombolysis ( <i>n</i> , %)                  | 4 (0,3)                 | 2 (0,3)                       | 2 (0,2)                     | 0.8487         |
| GPI IIb/IIIa during angiogram ( <i>n</i> , %) | 375 (25,6)              | 153 (23,1)                    | 222 (27,7)                  | 0.0445         |
| Bivalirudin ( <i>n</i> , %)                   | 1 (0,07)                | 0                             | 1 (0,1)                     | 0.3632         |
| Periprocedural factors                        |                         |                               |                             |                |
| IVUS ( <i>n</i> , %)                          | 1 (0,07)                | 0                             | 1 (0,1)                     | 0.3632         |
| OCT ( <i>n</i> , %)                           | 1 (0,07)                | 0                             | 1 (0,1)                     | 0.3632         |
| Vascular access ( <i>n</i> , %)               |                         |                               |                             |                |
| radial                                        | 476 (32,5)              | 196 (29,6)                    | 280 (34,9)                  | 0.0296         |
| femoral                                       | 989 (67,5)              | 467 (70,4)                    | 522 (65,1)                  |                |
| FFR ( <i>n</i> , %)                           | 1 (0,07)                | 0                             | 1 (0,1)                     | 0.3632         |
| Aspiration thrombectomy ( <i>n</i> , %)       | 200 (13,7)              | 85 (12,8)                     | 115 (14,3)                  | 0.3996         |
| Rotablation ( <i>n</i> , %)                   |                         |                               |                             |                |
| GPI IIb/IIIa during PCI ( <i>n</i> , %)       | 113 (7,7)               | 41 (6,2)                      | 72 (9,0)                    | 0.0461         |
| TIMI before PCI ( <i>n</i> , %)               |                         |                               |                             |                |
| 0                                             | 1084 (74,0)             | 495 (74,7)                    | 589 (73,4)                  | 0.6061         |
| 1                                             | 188 (12,8)              | 86 (13,0)                     | 102 (12,7)                  |                |
| 2                                             | 126 (8,6)               | 50 (7,5)                      | 76 (9,5)                    |                |
| 3                                             | 67 (4,6)                | 32 (4,8)                      | 35 (4,4)                    |                |
| TIMI after PCI ( <i>n</i> , %)                |                         |                               |                             |                |
| 0                                             | 530 (36,4)              | 245 (37,2)                    | 285 (35,7)                  | 0.8231         |
| 1                                             | 215 (14,8)              | 94 (14,3)                     | 121 (15,2)                  |                |
| 2                                             | 255 (17,5)              | 119 (18,1)                    | 136 (17,0)                  |                |
| 3                                             | 457 (31,4)              | 201 (30,5)                    | 256 (32,1)                  |                |
| Total amount of contrast, ml, median (Q1-Q3)  | 160 (100–210)           | 160 (100–200)                 | 156 (100–220)               | 0.4689         |
| Total radiation dose, mGy, median (Q1-Q3)     | 900 (440–1644)          | 778 (407–1419)                | 1028 (471–1749)             | <0.0001        |

ASA, acetylosalicylic acid; FFR, fractional flow reserve; GPI IIb/IIIa, IIb/IIIa glycoprotein inhibitor; IVUS, intravascular ultrasonography; LMWH, *low molecular weight heparin*; PCI, percutaneous coronary intervention; TIMI, thrombolysis in myocardial infarction; UFH, unfractionated heparin.

**Table S5.** Coronary anatomy, implanted stents, and complications during the procedure.

| Variable                                      | Total<br><i>n</i> =1465 | Women<br><i>n</i> =663 (45,3) | Men<br><i>n</i> =802 (54,7) | <i>p</i> value |
|-----------------------------------------------|-------------------------|-------------------------------|-----------------------------|----------------|
| Coronary anatomy & implanted stents           |                         |                               |                             |                |
| RCA ( <i>n</i> , %)                           | 366 (25,0)              | 182 (27,5)                    | 184 (22,9)                  | 0,0473         |
| LMCA ( <i>n</i> , %)                          | 268 (18,3)              | 86 (13,0)                     | 182 (22,7)                  | <0.0001        |
| LAD ( <i>n</i> , %)                           | 835 (57,0)              | 386 (58,2)                    | 449 (56,0)                  | 0.3899         |
| SvG ( <i>n</i> , %)                           | 10 (0,7)                | 2 (0,3)                       | 8 (1,0)                     | 0.1075         |
| LIMA/RIMA ( <i>n</i> , %)                     | 2 (0,1)                 | 0                             | 2 (0,2)                     | 0.1983         |
| Bifurcation ( <i>n</i> , %)                   | 93 (6,3)                | 36 (5,4)                      | 57 (7,1)                    | 0.1901         |
| DES ( <i>n</i> , %)                           | 765 (52,2)              | 331 (49,9)                    | 434 (54,1)                  | 0.1101         |
| BVS ( <i>n</i> , %)                           | 3 (0,2)                 | 1 (0,2)                       | 2 (0,2)                     | 0.6780         |
| BMS ( <i>n</i> , %)                           | 197 (13,4)              | 102 (15,4)                    | 95 (11,8)                   | 0.0482         |
| Number of implanted stents ( <i>n</i> , %)    |                         |                               |                             |                |
| 0                                             | 521 (35,6)              | 238 (35,9)                    | 283 (35,3)                  | 0.9341         |
| 1                                             | 643 (43,9)              | 293 (44,2)                    | 350 (43,6)                  |                |
| 2                                             | 231 (15,8)              | 100 (15,1)                    | 131 (16,3)                  |                |
| 3                                             | 70 (8,4)                | 32 (4,8)                      | 38 (4,7)                    |                |
| DEB ( <i>n</i> , %)                           | 13 (0,9)                | 9 (1,4)                       | 4 (0,5)                     | 0.0816         |
| Complications during the procedure            |                         |                               |                             |                |
| Cardiac arrest ( <i>n</i> , %)                | 271 (18,5)              | 116 (17,5)                    | 155 (19,3)                  | 0.3693         |
| Stroke ( <i>n</i> , %)                        | 1 (0,07)                | 1 (0,2)                       | 0                           | 0.2714         |
| Dissection ( <i>n</i> , %)                    | 7 (0,5)                 | 6 (0,9)                       | 1 (0,1)                     | 0.0312         |
| Bleeding at the puncture site ( <i>n</i> , %) | -                       | -                             | -                           | -              |
| Allergic reaction ( <i>n</i> , %)             | -                       | -                             | -                           | -              |
| No reflow ( <i>n</i> , %)                     | 125 (8,5)               | 53 (8,0)                      | 72 (9,0)                    | 0.5025         |
| Coronary artery perforation ( <i>n</i> , %)   | 14 (1,0)                | 10 (1,5)                      | 4 (0,5)                     | 0.0481         |

BMS, bare metal stent; BVS, bioresorbable vascular scaffold; DEB, drug eluting balloon; DES, drug eluting stent; LAD, critical stenosis of left anterior descending; LMCA, critical stenosis of left main coronary artery; LIMA/RIMA, critical stenosis of left internal mammary artery/ right internal mammary artery; RCA, critical stenosis of right coronary artery; SvG, critical stenosis of saphenous vein graft.
